# Supplementary material
Source: PubMed Central journal article supplement (PMC450296)
Supplement: 1471-2180-4-14-s1.pdf [file 1471-2180-4-14-s1.pdf]

| Position       | Strand | Sequence                  | Score        | Downstream ORF                                                                                       |
|----------------|--------|---------------------------|--------------|------------------------------------------------------------------------------------------------------|
| 501510         | +      | CTTGTATGGTCTAGTCCA        | 83.07        | -N(171)- - SCO0481 - - putative secreted chitin binding protein                                      |
| 562712         | +      | CCTCATTGGTCCATGCCA        | 81.65        | -N(73)- - SCO0531 - - putative sugar transporter sugar binding protein                               |
| 960415         | +      | GGATTTTGGTATGGACCA        | 87.28        | -N(68)- - SCO0915 - - hypothetical protein SCM10.03                                                  |
| 960421         | -      | TTGTAATGGTCCATACCA        | 85.00        | -N(129)- - SCO0914 - - putative lipoprotein                                                          |
| 1176060        | -      | CCCGTTTGGTCTAGACCG        | 85.00        | -N(133)- - SCO1117 - - putative secreted protein                                                     |
| 1300521        | -      | TTTGACAGGTCTGGACCA        | 81.00        | -N(190)- - SCO1226 - - putative bifunctional protein                                                 |
| 1333748        | -      | CGGGATTGGTCTTGACCA        | 89.00        | -N(115)- - SCO1262 - - putative gntR-family transcriptional regulator                                |
| 1474013        | -      | GGACGGTGGTCAAGAGCA        | 80.00        | -N(5492)- - SCO1389 - - putative CDP-diacylglycerol--glycerol-3-phosphate 3-phosphatidyl-transferase |
| 1474173        | +      | GGAGTGTGGTCTAGACCT        | 82.83        | -N(100)- - SCO1390 - - putative PTS system sugar phosphotransferase component IIA                    |
| 1474179        | -      | GATTAGAGGTCTAGACCA        | 87.00        | -N(5658)- - SCO1389 - - putative CDP-diacylglycerol--glycerol-3-phosphate 3-phosphatidyl-transferase |
| <b>1524679</b> | +      | <b>CAAGAATGGTCCGAACCA</b> | <b>82.01</b> | <b>-N(88)- - SCO1429 - - chitinase (putative secreted protein)</b>                                   |
| 1524685        | -      | GGTCAATGGTTCGGACCA        | 84.00        | -N(292)- - SCO1428 - - acyl-CoA dehydrogenase                                                        |
| 1528646        | +      | CAATATTGGTGTGCGACCA       | 89.83        | -N(175)- - SCO1433 - - hypothetical protein SC6D7.06c.                                               |
| 1528652        | -      | AACCAGTGGTTCGACACCA       | 86.00        | -N(88)- - SCO1432 - - putative membrane protein.                                                     |
| 1539552        | -      | GTCAATAGGTATGGACCA        | 82.00        | -N(427)- - SCO1443 - - putative riboflavin synthase                                                  |
| <b>2701155</b> | +      | <b>GCCACTTGGTCCAGACCT</b> | <b>82.77</b> | <b>-N(69)- - SCO2503 - - putative chitinase precursor</b>                                            |
| <b>2701176</b> | +      | <b>GACGAAAGGTCTGGACCA</b> | <b>80.38</b> | <b>-N(48)- - SCO2503 - - putative chitinase precursor</b>                                            |
| 2999771        | +      | GACCGGTGGTCTGGACAA        | 80.76        | -N(90)- - SCO2753 - - putative LacI-family transcriptional regulator.                                |
| 2999777        | -      | GCGGTCTTGTCCAGACCA        | 81.00        | -N(129)- - SCO2752 - - putative oxidoreductase                                                       |
| 3092623        | -      | GAGACTTGGTCTAGACCT        | 84.00        | -N(72)- - SCO2833 - - secreted chitin binding protein.                                               |
| 3157678        | +      | GTCAACTGGTCTACACCA        | 90.31        | -N(11)- - SCO2906 - - putative PTS transmembrane component                                           |
| 3157684        | -      | GTACACTGGTGTAGACCA        | 94.00        | -N(136)- - SCO2905 - - hypothetical protein                                                          |
| 3159192        | +      | TACAACAGGTCTACACCA        | 81.08        | -N(19)- - SCO2907 - - putative PTS transmembrane component                                           |
| 3159209        | +      | ACTGAGTGGTGTAGACCA        | 94.65        | -N(2)- - SCO2907 - - putative PTS transmembrane component                                            |
| 3203621        | -      | ACGAATTGGTTCAGACCT        | 83.00        | -N(114)- - SCO2946 - - putative sugar transporter sugar-binding protein                              |
| 3941161        | +      | CAGAACAGGTCTAAACCA        | 81.20        | -N(72)- - SCO3563 - - acetyl-coenzyme A synthetase                                                   |
| 4062291        | -      | CCGAATTGGACTAGACAA        | 82.00        | -N(637)- - SCO3678 - - putative deoxynucleotide triphosphate deaminase                               |
| 4701620        | +      | CTGCGGTGGTGTAGACCT        | 80.96        | -N(33)- - SCO4286 - - putative solute-binding protein (putative secreted protein)                    |
| 4810670        | -      | CCGCACTGGTCCAGACCG        | 83.00        | -N(57)- - SCO4393 - - conserved hypothetical protein                                                 |
| 4864652        | +      | CGTCATTGGCGTAAACCA        | 81.08        | -N(11)- - SCO4442 - - hypothetical protein SCD6.20                                                   |
| 5103047        | -      | TCCCACTGGTCTGTACCA        | 85.00        | -N(57)- - SCO4671 - - putative lysR-family regulatory protein                                        |

|                |   |                           |              |                 |                                                                              |
|----------------|---|---------------------------|--------------|-----------------|------------------------------------------------------------------------------|
| 5441751        | + | ACAAGGTGGTCCAGACCA        | 91.65        | -N(228)-        | - SCO5004 - - hypothetical protein SCK15.06                                  |
| <b>5441757</b> | - | <b>TTCAATTGGTCTGGACCA</b> | <b>93.00</b> | <b>-N(79)-</b>  | <b>- SCO5003 - - chitinase A precursor</b>                                   |
| 5691982        | + | CACCCTTGGTCTAGTCCA        | 85.17        | -N(292)-        | - SCO5232 - - putative sugar transporter sugar binding protein               |
| 5691988        | - | CACCTATGGACTAGACCA        | 83.00        | -N(152)-        | - SCO5231 - - putative gntR-family transcriptional regulator                 |
| 5692174        | + | TCCTATTGGTCTGGGCCA        | 84.03        | -N(100)-        | - SCO5232 - - putative sugar transporter sugar binding protein               |
| 5692180        | - | GGAGCTTGGCCCAGACCA        | 80.00        | -N(344)-        | - SCO5231 - - putative gntR-family transcriptional regulator                 |
| 5692198        | + | CCGTAAGTGGTCTACACCA       | 89.78        | -N(76)-         | - SCO5232 - - putative sugar transporter sugar binding protein               |
| 5692204        | - | GACCAATGGTGTAGACCA        | 93.00        | -N(368)-        | - SCO5231 - - putative gntR-family transcriptional regulator                 |
| 5698146        | - | TTAGATTGGTCTAAACCA        | 92.00        | -N(70)-         | - SCO5236 - - putative glucosamine phosphate isomerase                       |
| 5699808        | + | GGTTAGTGGTCTAGTCCA        | 86.34        | -N(305)-        | - SCO5239 - - histidine kinase                                               |
| <b>5847192</b> | - | <b>CCACATTGGTCCAGACCT</b> | <b>87.00</b> | <b>-N(111)-</b> | <b>- SCO5376 - - chitinase C (putative secreted protein)</b>                 |
| 6081713        | + | GTCCTTTGGTGGAAACCA        | 82.60        | -N(7)-          | - SCO5580 - - putative prokaryotic docking protein                           |
| <b>6172753</b> | + | <b>CAGAATTGGTCTGGACCA</b> | <b>93.03</b> | <b>-N(33)-</b>  | <b>- SCO5673 - - secreted chitinase</b>                                      |
| 6394373        | + | TTGAAGTTGTCTAGACCA        | 88.98        | -N(138)-        | - SCO5842 - - conserved hypothetical protein SC9B10.09                       |
| 6394379        | - | CAAGACTGGTCTAGACAA        | 88.00        | -N(53)-         | - SCO5841 - - phosphocarrier protein hpr                                     |
| 6394388        | + | CCAGTCTTGTCTAGACCA        | 85.84        | -N(123)-        | - SCO5842 - - conserved hypothetical protein SC9B10.09                       |
| 6394394        | - | GGAAACTGGTCTAGACAA        | 88.00        | -N(68)-         | - SCO5841 - - phosphocarrier protein hpr                                     |
| <b>6524059</b> | + | <b>ACGCATTGGTCCAGACCT</b> | <b>86.13</b> | <b>-N(65)-</b>  | <b>- SCO5954 - - chitinase (putative secreted protein)</b>                   |
| 6594664        | + | ACGCAATGGTCTGGACCA        | 91.25        | -N(244)-        | - SCO6013 - - probable 1-deoxyxylulose-5-phosphate synthase                  |
| <b>6594670</b> | - | <b>CCATTCTGGTCCAGACCA</b> | <b>90.00</b> | <b>-N(113)-</b> | <b>- SCO6012 - - putative secreted chitinase (putative secreted protein)</b> |
| <b>6594743</b> | - | <b>CCCGGGTGGTCCAGTCCA</b> | <b>80.00</b> | <b>-N(186)-</b> | <b>- SCO6012 - - putative secreted chitinase (putative secreted protein)</b> |
| 6622653        | + | GATTCTTGGTATAGACCA        | 92.70        | -N(362)-        | - SCO6033 - - hypothetical protein SC1C3.21                                  |
| 6622659        | - | CCTCCTTGGTCTATACCA        | 90.00        | -N(42)-         | - SCO6032 - - putative hydrolase                                             |
| 6622767        | + | CCGCCTTGGTCTAGTCCA        | 85.63        | -N(248)-        | - SCO6033 - - hypothetical protein SC1C3.21                                  |
| 6622773        | - | TCACAATGGACTAGACCA        | 88.00        | -N(156)-        | - SCO6032 - - putative hydrolase                                             |
| <b>6961928</b> | - | <b>CCTATTTTGTCTAGACCT</b> | <b>80.00</b> | <b>-N(118)-</b> | <b>- SCO6300 - - putative secreted hydrolase</b>                             |
| 6976834        | + | ACGTATTGGTCTGAACCA        | 87.70        | -N(0)-          | - SCO6319 - - putative lipoprotein                                           |
| 6976840        | - | CCCTCATGGTTCAGACCA        | 85.00        | -N(400)-        | - SCO6318 - - conserved hypothetical protein                                 |
| 7178544        | + | CTTCAGTGGTCCAGACCA        | 94.22        | -N(41)-         | - SCO6486 - - putative transport associated protein                          |
| 7846353        | - | CCCAGCTGGTTTAGACCA        | 90.00        | -N(81)-         | - SCO7056 - - putative gntR-family transcriptional regulator                 |
| 7859573        | - | TCATATTGGTCCGGACCT        | 81.00        | -N(63)-         | - SCO7069 - - putative secreted hydrolase                                    |
| <b>8030532</b> | + | <b>CGACCCTTGTCTAGACCA</b> | <b>84.42</b> | <b>-N(138)-</b> | <b>- SCO7225 - - secreted chitinase</b>                                      |
| 8030538        | - | CGCTATTGGTCTAGACAA        | 88.00        | -N(161)-        | - SCO7224 - - putative integral membrane protein                             |
| <b>8030645</b> | + | <b>TCGCTATGGTCTAGACCT</b> | <b>83.78</b> | <b>-N(25)-</b>  | <b>- SCO7225 - - secreted chitinase</b>                                      |
| 8030651        | - | GACTTCAGGTCTAGACCA        | 82.00        | -N(274)-        | - SCO7224 - - putative integral membrane protein                             |

|         |   |                    |       |          |                |                               |
|---------|---|--------------------|-------|----------|----------------|-------------------------------|
| 8073122 | + | TTGAACTGGTCTACACCC | 80.71 | -N(142)- | <b>SCO7263</b> | - - chitinase                 |
| 8073139 | + | CTTGACTGGTACAGACCA | 90.51 | -N(125)- | <b>SCO7263</b> | - - chitinase                 |
| 8289550 | + | GACGATAGGTAGAGACCA | 81.36 | -N(157)- | SCO7477        | - - putative membrane protein |

**Table 2. Sites in the *Streptomyces coelicolor* genome that match the sequence motif represented by matrix 2083.** The non-coding regions of the *S. coelicolor* genome were searched against this matrix to find matches to the corresponding sequence motif. The scanning method assigned a score (maximum 100) to each match site. The minimum score threshold was chosen as 80. The position of the match site is given as the chromosomal sequence coordinate. Descriptions of potential target genes immediately downstream of the motifs were taken from the *S. coelicolor* genome annotation. The distance in nucleotides between the 3' end of the motif and the predicted translational start codon is given in parentheses. The nine genes belonging to functional class 2.1.3 are shown in bold and other genes implicated in carbohydrate transport and catabolism are italicised.
