# Supplementary material
Source: PubMed Central journal article supplement (PMC450296)
Supplement: 1471-2180-4-14-s2.pdf [file 1471-2180-4-14-s2.pdf]

| Position       | Strand | Sequence                            | Score        | Downstream ORF                                                    |
|----------------|--------|-------------------------------------|--------------|-------------------------------------------------------------------|
| 11367          | -      | GCTGGTCAGTGGCGTGTGTGGGTGAGGA        | 82.00        | -N(7)- - SCO0008 - - hypothetical protein                         |
| 11616          | -      | ACGGAGCAGTGATCTTTAGGGGGGTGGA        | 86.00        | -N(256)- - SCO0008 - - hypothetical protein                       |
| 1327954        | -      | AATTGTCAGTGGCGGGCGGTTTACTGGA        | 85.00        | -N(30)- - SCO1256 - - hypothetical protein 2SCG18.03c             |
| <b>1577632</b> | -      | <b>TGTTGTCAGTGGCCTTTGCGAGAATGCA</b> | <b>83.00</b> | <b>-N(30)- - SCO1475 - - putative primosomal protein n'</b>       |
| 1659087        | -      | GATTGTCAGTGCCCGGCGGAGAGTTGA         | 86.00        | -N(516)- - SCO1550 - - putative small membrane protein            |
| <b>2107230</b> | -      | <b>CGTTGTCAGTGCGGGTTCGTACGGTGGA</b> | <b>89.00</b> | <b>-N(31)- - SCO1966 - - ABC excision nuclease subunit B</b>      |
| 2263276        | -      | GACTGTCAGTGCCAGGTGGCAGGCTGGA        | 82.00        | -N(30)- - SCO2105 - - putative transcriptional regulatory protein |
| 2649302        | +      | GTTAATCGGTTGAGGTAACGCGGGTGGGA       | 80.15        | -N(40)- - SCO2463 - - putative ABC transporter                    |
| 3328227        | -      | CATGTCCAGTATCAGGGGCATGCGTGGA        | 81.00        | -N(18)- - SCO3040 - - putative secreted protein                   |
| 3343007        | -      | GATTGTCAGTGGTGGGTGAGACGGTGGA        | 93.00        | -N(79)- - SCO3050 - - hypothetical protein                        |
| <b>3911591</b> | -      | <b>CGTTGTCAGTGCCGCCCGCACAAATGGA</b> | <b>84.00</b> | <b>-N(134)- - SCO3541 - - putative DNA polymerase</b>             |
| 4461113        | +      | CGATGTCAGTGCCGGGTGCCACAGTGGG        | 80.30        | -N(58)- - SCO4069 - - putative integral membrane protein          |
| 4492827        | -      | CAGGACCATTGTCGGGTACGACCGTGGA        | 80.00        | -N(116)- - SCO4093 - - putative integral membrane protein         |
| 4513626        | -      | CATTGTCAGTGGCGCAGTGCACATCGA         | 81.00        | -N(35)- - SCO4113 - - conserved hypothetical protein              |
| 4862522        | +      | ATTTACCAGTGTCTGTGTACGGGTGGA         | 82.18        | -N(92)- - SCO4440 - - hypothetical protein SCD6.18                |
| 5033880        | +      | GTTGACCAGTACGGAAGGGTCCACTGGA        | 81.24        | -N(76)- - SCO4609 - - putative peptidase                          |
| 5228044        | +      | GATTGTCAGTGGCGTGGTGCACCGTGGA        | 92.94        | -N(13)- - SCO4803 - - conserved hypothetical protein              |
| 6155964        | -      | CGTGACAGTGAAGCCGTGGCCAGTCGA         | 83.00        | -N(15)- - SCO5656 - - transcriptional regulatory protein          |
| <b>6301295</b> | -      | <b>GATTGTCAGTGGCCGGTGCACGATGGA</b>  | <b>87.00</b> | <b>-N(30)- - SCO5761 - - putative ATP-dependent DNA helicase</b>  |
| <b>6388951</b> | -      | <b>GGCTGTCAGTGCCGAGTCCACAATGGA</b>  | <b>81.00</b> | <b>-N(71)- - SCO5836 - - DNA gyrase-like protein</b>              |
| <b>6682703</b> | +      | <b>GATTGTCAGTGGCCCGTGGCAGGGTGGA</b> | <b>92.41</b> | <b>-N(14)- - SCO6084 - - putative DNA polymerase</b>              |
| 8655917        | +      | ACGGAGCAGTGATCTTTAGGGGGGTGGA        | 86.79        | -N(203)- - SCO7839 - - hypothetical protein SC8E7.36.             |

**Table 3. Sites in the *Streptomyces coelicolor* genome that match the sequence motif represented by matrix 2318.** The non-coding regions of the *S. coelicolor* genome were searched against this matrix to find matches to the corresponding sequence motif. The scanning method assigned a score (maximum 100) to each match site. The minimum score threshold was chosen as 80. The position of the match site is given as the chromosomal sequence coordinate. Descriptions of potential target genes immediately downstream of the motifs were taken from the *S. coelicolor* genome annotation. The distance in nucleotides between the 3' end of

the motif and the predicted translational start codon is given in parentheses. The six genes belonging to functional class 2.1.3 are shown in bold.
