# Supplementary material
Source: PubMed Central journal article supplement (PMC450296)
Supplement: 1471-2180-4-14-s4.pdf [file 1471-2180-4-14-s4.pdf]

| Position      | Strand | Sequence                                 | Score        | Downstream ORF                                                     |
|---------------|--------|------------------------------------------|--------------|--------------------------------------------------------------------|
| <b>31472</b>  | -      | <b>AGAAGAGGACCGGACAGCATGCCGATTTGTGAC</b> | <b>80.00</b> | <b>-N(198)- - SCO0038 - - putative sigma factor</b>                |
| 127415        | +      | CTGTACGGACCGATCATGGACCTCGTCTGTGAC        | 81.13        | -N(123)- - SCO0135 - - conserved hypothetical protein SCJ21.22     |
| 140352        | -      | CGTCGTTGACCACCCAAGCCAGGTAGCCGGGAC        | 80.00        | -N(53)- - SCO0149 - - hypothetical protein SCJ33.13c               |
| 282399        | +      | TGGCCTTGACAGGCCGTGAGCCCGAAACCTAAC        | 80.51        | -N(59)- - SCO0290 - - probable solute-binding protein              |
| 333233        | +      | GAGCGCTGACACCACCGAGGAGATCACCGTGAC        | 83.77        | -N(263)- - SCO0332 - - putative transcriptional regulator          |
| 482394        | +      | ACAACCTGACCTAACCCCTTAAGTGCCTTGAC         | 82.22        | -N(29)- - SCO0461 - - putative hydrolase                           |
| 482417        | +      | TGCGCTTGACAGGTTATCTCCGGAGTGCTGGAC        | 80.01        | -N(6)- - SCO0461 - - putative hydrolase                            |
| 533800        | -      | TCCTGTTGTCCGAGCCCAGGAGGTCGCCATGAC        | 81.00        | -N(27)- - SCO0500 - - hypothetical protein SCF34.19c               |
| <b>851096</b> | -      | <b>GCGGCATGACGGGGGAGCAGGACATGCGGGGAC</b> | <b>80.00</b> | <b>-N(22)- - SCO0803 - - putative RNA polymerase sigma factor.</b> |
| 1007229       | -      | CGACGGTGACAGGGAACGGCAGCGGCGATGAC         | 82.00        | -N(27)- - SCO0957 - - putative oxidoreductase                      |
| 1205710       | -      | CGTCCCTGACGGCATGTCCGAGGGGAGTGGGAC        | 80.00        | -N(41)- - SCO1146 - - putative lipoprotein                         |
| 1319640       | +      | GCAACATGACGGGGCCGGCTTCCCGTCCGGGAC        | 81.57        | -N(214)- - SCO1247 - - conserved hypothetical protein              |
| 1404617       | -      | CGATCCTCACCCGCCGCTACCCGTGGCTATGAC        | 83.00        | -N(51)- - SCO1328 - - hypothetical protein                         |
| 1409816       | -      | TTCGGGTGACCCGTGCGAGGTCGGTCGTTGAC         | 82.00        | -N(94)- - SCO1332 - - conserved hypothetical protein               |
| 1411450       | +      | AGGTGGTGACAGGCCACCGCCGGCGCCGTGAC         | 92.00        | -N(164)- - SCO1334 - - hypothetical protein                        |
| 1788546       | -      | ACCTGTTGCCGCGCCCCCTCGCCGCACTTGAC         | 80.00        | -N(90)- - SCO1668 - - hypothetical protein SCI52.10c               |
| 1895944       | -      | ACGTCTGGCAACTCTCACCGGGCCGGTGTGAC         | 81.00        | -N(145)- - SCO1774 - - putative regulatory protein                 |
| 1906252       | -      | GGCCCCGACGGCACAACCCGGCCCGCGTGAC          | 80.00        | -N(94)- - SCO1780 - - putative DNA repair protein                  |
| 2133025       | -      | CGGGAATGCCCCACCCGCAAGGGTGTTGTGAC         | 82.00        | -N(61)- - SCO1997 - - conserved hypothetical protein               |
| 2192173       | -      | CCCGGGTGACGGTTCGCCCGGGGTTCCGGTGAT        | 81.00        | -N(33)- - SCO2042 - - putative membrane protein                    |
| 2257128       | +      | GGGCCATGACGATCCTCCTGTCTCGTCTCCGTGAC      | 88.55        | -N(126)- - SCO2100 - - putative transcriptional regulator          |
| 2270988       | +      | CCATCCTGACAGACCCGGACCGATGCCCTGAC         | 88.57        | -N(123)- - SCO2113 - - putative bacterioferritin                   |
| 2283558       | -      | GGCCATTGACGGTGTCCCGGGATAAGGTCTGAC        | 84.00        | -N(55)- - SCO2122 - - conserved hypothetical protein               |
| 2324992       | -      | TCACTTTGACGATGTTTCATAGTGTCCGGTGTGAC      | 84.00        | -N(268)- - SCO2161 - - conserved hypothetical protein              |
| 2517757       | +      | GTCCCGCGACGGCACTCGTCAAAGTCTGTGAC         | 81.18        | -N(103)- - SCO2348 - - putative secreted protein                   |
| 2517774       | -      | GGAGTGCGACGGGACTCGTCACAGGACTTTGAC        | 81.00        | -N(381)- - SCO2347 - - putative integral membrane protein          |
| 2524293       | +      | GCGAACTGACCGGCCCGTGTGTTTCGTCCCTAAC       | 80.10        | -N(16)- - SCO2356 - - putative membrane protein                    |
| 2691737       | -      | CAGGCGCGACGGGCACCGCCCCGCGTGCCTGAC        | 82.00        | -N(41)- - SCO2497 - - conserved hypothetical protein SCC82.03c     |
| 2789638       | -      | CCAACCTTGACCTGTGGCGGCGGTTTACGCGAC        | 80.00        | -N(56)- - SCO2583 - - putative membrane protein.                   |
| 2794370       | -      | CGGTGGTGACGGAGCGGGGCACGGCGCGGTGGG        | 80.00        | -N(860)- - SCO2587 - - glutamate 5-kinase.                         |
| 2857099       | -      | CCCGGGTGACGTCCGCTCACCTGCTCGGTGAC         | 83.00        | -N(27)- - SCO2630 - - putative biotin synthase                     |
| 2885449       | +      | CGCCCCTGACCGGCCGATCCCCCTACGCTGAG         | 81.58        | -N(1)- - SCO2654 - - conserved hypothetical protein SC8E4A.24      |
| 2943033       | +      | CCCCCGTGACCCGCTGCGACCGGGTGCGTTGAA        | 84.48        | -N(26)- - SCO2699 - - putative small membrane protein              |

|                |   |                                          |              |                 |                |                                                               |
|----------------|---|------------------------------------------|--------------|-----------------|----------------|---------------------------------------------------------------|
| 2989172        | + | TGCACGGGACACCGGCCCGGGGTTCTGTGAC          | 82.93        | -N(71)-         | SCO2743        | - conserved hypothetical protein SCC57A.14                    |
| <b>2989218</b> | - | <b>ACCCTGTGACAGGACGCGGACGTGACCCGGGAC</b> | <b>80.00</b> | <b>-N(73)-</b>  | <b>SCO2742</b> | <b>- putative sigma factor</b>                                |
| 3062140        | - | CGGCTGTGACGGAGCGGCCACGCGCTGTTTGGC        | 84.00        | -N(179)-        | SCO2804        | - hypothetical protein                                        |
| 3084207        | - | AGGTGTTGACGCGGAAGTTAACCGGCTGTTGAC        | 83.00        | -N(147)-        | SCO2823        | - putative decarboxylase                                      |
| 3118340        | - | TGGCGCTGACGGGCTCGGCGCCGCCCTGCTCAC        | 81.00        | -N(129)-        | SCO2862        | - hypothetical protein SCE20.36c.                             |
| 3260550        | - | CGCCGCTGATTCAAGTGGGAGGCATGGCTGTGAC       | 81.00        | -N(12)-         | SCO2991        | - hypothetical protein SCE50.19c                              |
| 3314528        | + | TGCTATGGACCCTGCCGACTGGCCACTTTGAC         | 83.75        | -N(297)-        | SCO3031        | - hypothetical protein SCE34.12                               |
| 3357001        | + | GACCTGTGGCCGGCCTCACCGCGTGCAGTGAC         | 82.58        | -N(128)-        | SCO3064        | - putative peptide transporter                                |
| 3378662        | - | GCCCGTTGACAGTGGCGCGGGAGGCCGAGAC          | 83.00        | -N(149)-        | SCO3084        | - p-hydroxybenzoate hydroxylase                               |
| 3393063        | - | CGGTCATGACCGCTCGCCATCGCGGGCCCCGAC        | 80.00        | -N(246)-        | SCO3097        | - putative secreted protein                                   |
| 3443180        | - | CCCGGGTGACCGTTCCGGCCCCGTCCCTGTGAC        | 85.00        | -N(204)-        | SCO3144        | - putative two-component system response regulator            |
| 3469571        | - | CCCACCTGACGTAACCTCCCCACTGCCTTGAA         | 80.00        | -N(112)-        | SCO3166        | - putative membrane transport protein                         |
| <b>3715327</b> | + | <b>CTGAGCTGACGCACAGTCGCCTGCCTCTGTGAC</b> | <b>86.19</b> | <b>-N(244)-</b> | <b>SCO3356</b> | <b>- ECF sigma factor</b>                                     |
| 3827420        | + | CGGTGGTGACGGCGCGTGACGGGTTTCGTTGAC        | 90.93        | -N(4)-          | SCO3468        | - transposase                                                 |
| 3906828        | - | TTGAACTGTCCTACTAGGGGTGGGTTTCCTTGAC       | 81.00        | -N(27)-         | SCO3538        | - hypothetical protein                                        |
| 3918008        | - | CCCGTTTGACACGGGGCGGGAGGTACCGTCAC         | 81.00        | -N(123)-        | SCO3543        | - probable DNA topoisomerase I                                |
| 4080615        | + | ACGCCGTGGCCGTACCGTCCCGGGACGGTGAC         | 82.26        | -N(2)-          | SCO3703        | - putative substrate binding protein                          |
| 4135323        | - | ATCCCGTGACGTAGCCATGTACGCGCCAATGAC        | 81.00        | -N(50)-         | SCO3762        | - hypothetical protein SCH63.09c                              |
| 4295722        | + | TTGAGGTGAACTTCGGGCGCGGGGTTTTGAC          | 81.69        | -N(460)-        | SCO3901        | - putative secreted penicillin-binding protein                |
| 4701575        | + | GGGCGATGACATGTCTCACGGGGACAGTGTGGC        | 80.31        | -N(63)-         | SCO4286        | - putative solute-binding protein (putative secreted protein) |
| 4876692        | + | CGGTCTTGACAGCGGAGGCGGGAAGCCGTTGAC        | 88.25        | -N(82)-         | SCO4455        | - putative integral membrane protein                          |
| 4943462        | - | TGGCCTTGACGTGTCTCTCCCAAGGACATGAA         | 80.00        | -N(9)-          | SCO4522        | - hypothetical protein SCD35.29c                              |
| 5002402        | - | CGTGCCTGACGTGACGCACCCCGATCACGTGAC        | 80.00        | -N(149)-        | SCO4580        | - putative fumarylacetoacetase                                |
| 5040537        | - | ATGCGATGACGCAGCCACGACGCGGACATGAC         | 83.00        | -N(166)-        | SCO4616        | - excisionase                                                 |
| 5043814        | - | CGGGTGTGACGCGCCCTCACAGTGTCCCGTCAC        | 81.00        | -N(123)-        | SCO4619        | - putative integral membrane protein                          |
| 5234822        | + | ATCATGTGACAGGCATCACCGCTCAGGTGTGAC        | 85.10        | -N(138)-        | SCO4808        | - succinyl-CoA synthetase beta chain                          |
| 5297444        | + | TCGTTGTGACCGGGCCCGCTCCGGGGCTGTGAG        | 90.57        | -N(80)-         | SCO4869        | - methylmalonyl CoA mutase                                    |
| 5372973        | - | CCTCTACGACGCGACGGCGCGGCCGTCTGTGAC        | 82.00        | -N(154)-        | SCO4937        | - hypothetical protein                                        |
| 5388960        | + | ACTGCATGACGGTTCCCTCCAGCGGGGGCATGAC       | 82.52        | -N(87)-         | SCO4952        | - putative tetR-family transcriptional regulator              |
| <b>5395895</b> | - | <b>AACCCTTGACCGGCGGCCGCCCTGGCCTGAT</b>   | <b>80.00</b> | <b>-N(73)-</b>  | <b>SCO4960</b> | <b>- putative sigma factor</b>                                |
| 5462356        | - | TCCGGGTGACACGACCCGCACGGCCGGCTTGAC        | 85.00        | -N(406)-        | SCO5027        | - hypothetical protein SCK15.29c                              |
| 5542028        | + | CGCCTGTGACCGGAGGCATCGGTGTGCGGAGAC        | 81.28        | -N(147)-        | SCO5101        | - conserved hypothetical protein                              |
| <b>5674998</b> | + | <b>TGGGAATGACCGGCGGACGGCCACTGTTGTGCC</b> | <b>81.15</b> | <b>-N(188)-</b> | <b>SCO5216</b> | <b>- RNA polymerase sigma factor</b>                          |
| 5755914        | - | GCGCGGTGACTCCCCGTACGCTGCTGCCCTGAC        | 82.00        | -N(107)-        | SCO5283        | - putative two-component system response regulator            |

|                |   |                                           |              |                                                                               |
|----------------|---|-------------------------------------------|--------------|-------------------------------------------------------------------------------|
| 5922101        | + | GGTGGCTGACGAGTGGTGCGTGGCGGGCATGAC         | 80.51        | -N(330)- - SCO5444 - - putative glycogen phosphorylase                        |
| 6285142        | + | GTGTGGCGACAGGCGGGGTGCGGCTACGATGAC         | 80.82        | -N(81)- - SCO5749 - - two-component regulator                                 |
| 6327614        | - | GTTACGTGACGGTCCGCGTCCGGGGTTCGTTGCC        | 82.00        | -N(141)- - SCO5790 - - hypothetical protein SC4H2.11c                         |
| 6357173        | + | GATTTCTGACGGTCCCGCTCGCAGGTATGTGCC         | 83.30        | -N(13)- - SCO5813 - - hypothetical protein                                    |
| 6388970        | + | CGGCACTGACAGCCACCGACCAGGACCCGTCAC         | 81.85        | -N(213)- - SCO5837 - - zinc protease                                          |
| 6442743        | - | GCCCCGCTGACGGCCCCCGTCCGGCGGCCCTGGC        | 80.00        | -N(129)- - SCO5885 - - putative membrane protein                              |
| 6501234        | + | AGGTATTGACGGCGTTTCGCCGTTCTCTATGAT         | 84.83        | -N(69)- - SCO5932 - - arabinofuranosidase                                     |
| 6532321        | - | GTGTGATGCCGGTGCGGCCCTCGCCACTGTGAA         | 80.00        | -N(105)- - SCO5961 - - putative cobalt transport protein                      |
| 6535131        | - | GTTAACTGAGCGGCACCCGCGGGTCCCGGTGAC         | 83.00        | -N(118)- - SCO5964 - - putative membrane protein                              |
| 6589522        | + | ACTTCTTGACGTGCGACGTGTGGCCGAGTTGAC         | 87.57        | -N(20)- - SCO6009 - - solute-binding protein                                  |
| 6603579        | - | AGCCGGTGACAAGAGAGGACCAGGTGCGATGAC         | 85.00        | -N(27)- - SCO6020 - - putative transcriptional regulator                      |
| 6674814        | + | TGGTGTTGACGTACCCCGCAAGTCGTGACTGAC         | 84.90        | -N(220)- - SCO6080 - - putative dehydrogenase                                 |
| 6829706        | + | ATGAAGTGACGCCGGCGTCCCGTGCGGTCTGAC         | 84.89        | -N(278)- - SCO6215 - - hypothetical protein SC9G1.05                          |
| 6848913        | - | TCGTCATGACAGTCGTCGGTCCCGCCGTGAC           | 86.00        | -N(72)- - SCO6226 - - hypothetical protein SC2H4.08c                          |
| 6864163        | + | GCAACATGACGACGACGAGCCGGAAGAATGTGAG        | 80.66        | -N(130)- - SCO6241 - - hypothetical protein SCAH10.06                         |
| 6898953        | - | TGCGCATGACTGTTCCGAACAGGGCGGCGTGAA         | 80.00        | -N(92)- - SCO6271 - - putative acyl-CoA carboxylase complex A subunit         |
| 6974845        | - | GTCGGCTGACGCGGCTTAGAGCAGCTTTGTGAC         | 83.00        | -N(779)- - SCO6313 - - putative integral membrane protein                     |
| 7041192        | - | CAGAGTTGACCTGCAATGTGAGGACAAAGTGAC         | 82.00        | -N(138)- - SCO6377 - - putative lipoprotein                                   |
| 7045298        | - | AGCCTGTGACCAGCCGAGCTGCGCCGCCGTGAC         | 88.00        | -N(231)- - SCO6381 - - putative lipoprotein                                   |
| 7166531        | + | GGGCGTGACACGCCCCGCCGGCGGCGCTGTGAC         | 80.20        | -N(179)- - SCO6476 - - hypothetical protein SC9C7.12                          |
| 7586368        | - | CGGCTGTGGCCGGCCGTCGCACGGGGGAATGAC         | 80.00        | -N(704)- - SCO6821 - - putative transferase.                                  |
| 7613224        | - | CTCTGGTGGCAGCCCCGCCGGTGCCTTCTCTGAC        | 80.00        | -N(417)- - SCO6840 - - hypothetical protein SC3D9.08c                         |
| 7766234        | - | TGGCGGTGACGACGGCCGGGGCCCGGGCGTGAC         | 84.00        | -N(122)- - SCO6994 - - hypothetical protein SC8F11.20c.                       |
| 7813892        | + | ACGTTTTGAGTCGGCAGCCGCACGGCCATTGAC         | 81.74        | -N(46)- - SCO7028 - - putative sugar-binding lipoprotein.                     |
| 7880110        | + | TCTCGGTGGCGGCCAGGCCCTGGGGGCGGTGAC         | 82.67        | -N(85)- - SCO7092 - - putative secreted protein                               |
| 7880164        | - | CGGTAGAGACCGTGTAGGCCCTCCCGGTGTGAC         | 82.00        | -N(154)- - SCO7091 - - hypothetical protein SC3A4.17c.                        |
| 7890263        | + | CAGAGCAGACCGCACAAAGCGCGGATCATGTGAC        | 80.34        | -N(130)- - SCO7100 - - putative oxidoreductase                                |
| <b>7893783</b> | + | <b>TCGCATTGACCCGGACAGTGACCAGCGCTGTGAC</b> | <b>93.80</b> | <b>-N(379)- - SCO7104 - - putative RNA polymerase sigma factor</b>            |
| <b>7896326</b> | - | <b>CCTGGAAGACCCGGACGGTCCGTGCGAATGTGAC</b> | <b>80.00</b> | <b>-N(305)- - SCO7105 - - putative RNA polymerase sigma factor</b>            |
| 7900259        | - | TCCAGATGACCGGGGACCCCGGCACGGTGTGAC         | 89.00        | -N(110)- - SCO7109 - - putative oxidoreductase                                |
| <b>7902455</b> | - | <b>CTGTCCTGACCCGGTGC CGCATCGATCCGTGAC</b> | <b>89.00</b> | <b>-N(199)- - SCO7112 - - putative ECF-family RNA polymerase sigma factor</b> |
| 7908761        | - | GACAACTGACTGCGTGTGCCACGCACTTGTGAC         | 83.00        | -N(133)- - SCO7118 - - hypothetical protein SC4B10.19c                        |
| 7918398        | + | TCACCTAGACAGAACGCGAGTCCTTCGTGTGAC         | 80.83        | -N(130)- - SCO7126 - - hypothetical protein SC4B10.27                         |
| 7918474        | - | CCCTCCTGACCCGGACACCGTGC CGCTCTGTGAC       | 93.00        | -N(193)- - SCO7125 - - conserved hypothetical protein                         |

|                |   |                                          |              |                                                                                          |
|----------------|---|------------------------------------------|--------------|------------------------------------------------------------------------------------------|
| 7921856        | + | GACCATTGACCGGGTGCCCGCGCGTTCTGTGAC        | 94.28        | -N(208)- - SCO7130 - - conserved hypothetical protein                                    |
| 7928643        | + | CCGCAATGACCGAGCGGTGCGGGCGCCTGTGAC        | 93.91        | -N(66)- - SCO7136 - - conserved hypothetical protein                                     |
| 7928702        | - | TCCTGGTGACAGGACACGCGCCCCGTCTGTGAC        | 91.00        | -N(147)- - SCO7135 - - hypothetical protein SC4B10.36c                                   |
| 7932367        | - | CCCTCTTGATGAGACGGCTCCCCGTTCTGTGAC        | 87.00        | -N(83)- - SCO7137 - - putative regulatory protein                                        |
| 7936527        | + | GAGGACCGACCGGCTTGCGGGGGCCCGTGTGAC        | 82.88        | -N(113)- - SCO7143 - - putative transcriptional regulator                                |
| 7944524        | - | AGCGTTTGACCGGACGGGCGGCCGATGTGTGAC        | 90.00        | -N(110)- - SCO7150 - - putative acetyltransferase                                        |
| 7949146        | - | CTGCTCTGACCGGCGAAGCCGGACATCTGTGAC        | 91.00        | -N(245)- - SCO7154 - - ketol-acid reductoisomerase                                       |
| 7981456        | + | TCTATTCGACAAGCGACGGCTCGCCCCGTGTGAC       | 81.19        | -N(128)- - SCO7181 - - putative branched amino acid transport system ATP-binding protein |
| <b>7995404</b> | + | <b>AACCAAAGACCGGGCGGGAGCGCCACCTGTGAC</b> | <b>83.10</b> | <b>-N(192)- - SCO7192 - - putative sigma factor</b>                                      |
| 8066389        | - | ACCCGCGGACCGGCCCGCCCCGGCCTCTTGAC         | 84.00        | -N(109)- - SCO7254 - - putative myo-inositol dehydrogenase                               |
| 8195495        | + | CCCCGATGGCCGCGCGGTGGCCCGCGTGTGAC         | 80.96        | -N(361)- - SCO7384 - - putative transmembrane transport protein.                         |
| 8372661        | - | GCGCTTTGACACACATCGCCATCGGGCGTTGAC        | 84.00        | -N(106)- - SCO7549 - - hypothetical protein                                              |
| 8461937        | - | ACCCACTGACAGTGCCGTCCGGGTCGGGAAGAC        | 80.00        | -N(97)- - SCO7633 - - putative secreted endo-beta-N-acetylglucosaminidase                |
| 8563083        | + | CGTCCATGACGGCAGTCTAACGAAATCGTTGAC        | 81.53        | -N(94)- - SCO7728 - - conserved hypothetical protein                                     |
| 8607517        | - | TCGAGCTGACGCACCGGTCCAAGGCGCCGGGAC        | 81.00        | -N(112)- - SCO7779 - - putative oxidoreductase                                           |
| 8608577        | + | GGGGTGTGACGGGGTGTGGCGAGTCTCGTTGAC        | 88.05        | -N(520)- - SCO7782 - - probable IS110 transposase                                        |

**Table 5. Sites in the *Streptomyces coelicolor* genome that match the sequence motif represented by matrix 46.** The non-coding regions of the *S. coelicolor* genome were searched against this matrix to find matches to the corresponding sequence motif. The scanning method assigned a score (maximum 100) to each match site. The minimum score threshold was chosen as 80. The position of the match site is given as the chromosomal sequence coordinate. Descriptions of potential target genes immediately downstream of the motifs were taken from the *S. coelicolor* genome annotation. The distance in nucleotides between the 3' end of the motif and the predicted translational start codon is given in parentheses. The 10 genes belonging to functional class 6.2.1 are shown in bold.
