# Supplementary material
Source: PubMed Central journal article supplement (PMC450296)
Supplement: 1471-2180-4-14-s9.pdf [file 1471-2180-4-14-s9.pdf]

| Position       | Strand   | Sequence                  | Score        | Downstream ORF                                                                      |
|----------------|----------|---------------------------|--------------|-------------------------------------------------------------------------------------|
| 189992         | -        | CCACGATGGTTCAGACAA        | 80.00        | -N(126)- - SAV169 - - hypothetical protein                                          |
| 247377         | -        | CAGAGCTGGTGTAGACCG        | 80.00        | -N(724)- - SAV211 - - hypothetical protein                                          |
| 801926         | +        | TGCCACTGTTGCAGACCA        | 81.45        | -N(831)- - SAV644 - - hypothetical protein                                          |
| 1218178        | +        | CACGACTGGCCTGGACCA        | 80.63        | -N(79)- - SAV957 - - hypothetical protein                                           |
| 1274359        | +        | ACAGTCGGGTCTAGACCA        | 84.12        | -N(311)- - SAV1008 - - hypothetical protein                                         |
| 1329137        | +        | <i>TCAATTTGGTACGGACCA</i> | 86.92        | -N(21)- - SAV1053 - - putative sugar hydrolase                                      |
| 1613336        | +        | CCCTGGTGGTTTAGACCA        | 90.07        | -N(25)- - SAV1305 - - putative GntR-family transcriptional regulator                |
| 1873454        | -        | AGATTCTGGTCTAGACCG        | 82.00        | -N(93)- - SAV1530 - - putative secreted protein                                     |
| <b>2132244</b> | <b>+</b> | <b>CCTTACCGGTCTGGACCA</b> | <b>82.70</b> | <b>-N(81)- chiA2 SAV1751 - - putative chitinase A</b>                               |
| <b>2132285</b> | <b>+</b> | <b>CGTGATTGGTCCATACCA</b> | <b>87.70</b> | <b>-N(40)- chiA2 SAV1751 - - putative chitinase A</b>                               |
| 2947277        | +        | <i>GGACACTGGTCTAGACAA</i> | 88.22        | -N(12)- <i>hpr SAV2418 - - putative phosphocarrier protein</i>                      |
| 2947283        | -        | CTCAGGTTGTCTAGACCA        | 85.00        | -N(112)- - SAV2417 - - hypothetical protein                                         |
| <b>3179630</b> | <b>-</b> | <b>CCGAATTGGTCTGGACCA</b> | <b>93.00</b> | <b>-N(64)- chiB SAV2585 - - putative chitinase B</b>                                |
| 3345948        | +        | TACAATTGTTCTAGACAA        | 83.38        | -N(100)- - SAV2728 - - putative transporter                                         |
| <b>3522866</b> | <b>+</b> | <b>GCGCACTGGTCCAGACCT</b> | <b>83.93</b> | <b>-N(95)- chiC SAV2878 - - putative chitinase C precursor</b>                      |
| <b>3522887</b> | <b>+</b> | <b>GACCTATGGTCCAGACCT</b> | <b>80.13</b> | <b>-N(74)- chiC SAV2878 - - putative chitinase C precursor</b>                      |
| 3773700        | +        | <i>ACATTGTGGACTAGACCA</i> | 85.20        | -N(254)- <i>gamA SAV3018 - - putative glucosamine-6-phosphate isomerase</i>         |
| 3773706        | -        | GGACCGTGGTCTAGTCCA        | 83.00        | -N(257)- - SAV3017 - - putative two-component system sensor kinase                  |
| 3773915        | +        | <i>CTAGATTGGTCTAAACCA</i> | 92.69        | -N(39)- <i>gamA SAV3018 - - putative glucosamine-6-phosphate isomerase</i>          |
| 3773921        | -        | CATATGTGGTTTAGACCA        | 91.00        | -N(472)- - SAV3017 - - putative two-component system sensor kinase                  |
| 3779785        | +        | GACCAATGGTGTAGACCA        | 93.18        | -N(301)- - SAV3023 - - putative GntR-family transcriptional regulator               |
| 3779791        | -        | <i>CCGTACTGGTCTACACCA</i> | 89.00        | -N(65)- - SAV3022 - - putative sugar transporter sugar binding protein              |
| 3779809        | +        | GGAGCTTGGCCCAGACCA        | 80.57        | -N(277)- - SAV3023 - - putative GntR-family transcriptional regulator               |
| 3779815        | -        | <i>GCCTATTGGTCTGGGCCA</i> | 84.00        | -N(89)- - SAV3022 - - putative sugar transporter sugar binding protein              |
| 3779955        | +        | GCGCGGTGGACTAGACCA        | 84.52        | -N(131)- - SAV3023 - - putative GntR-family transcriptional regulator               |
| 3779961        | -        | <i>CCCTGTTGGTCTAGTCCA</i> | 85.00        | -N(235)- - SAV3022 - - putative sugar transporter sugar binding protein             |
| 3969427        | -        | GGCGATTGGTTCAGGCCA        | 80.00        | -N(76)- - SAV3185 - - hypothetical protein                                          |
| <b>4053939</b> | <b>+</b> | <b>CCAGATTGGTCTGGACCA</b> | <b>93.91</b> | <b>-N(63)- chiA1 SAV3258 - - putative chitinase A</b>                               |
| 4053945        | -        | ACAAACTGGTCCAGACCA        | 94.00        | -N(257)- - SAV3257 - - hypothetical protein                                         |
| 4410220        | +        | <i>GCGTACTGGCCTACACCA</i> | 80.60        | -N(480)- <i>glmU SAV3561 - - putative UDP-N-acetylglucosamine pyrophosphorylase</i> |
| 4613717        | -        | TATCTGTGCTCTAGACCA        | 86.00        | -N(498)- - SAV3727 - - hypothetical protein                                         |
| 4620849        | -        | GCATACTCGTATAGACGA        | 80.00        | -N(107)- pra1 SAV3735 - - putative replication activator protein Pra                |
| 4763169        | +        | GCGCGCTGGTCCAGACCG        | 80.46        | -N(37)- - SAV3856 - - hypothetical protein                                          |
| 4863930        | -        | CTTACGTGGTGTAGACCT        | 82.00        | -N(69)- - SAV3939 - - putative secreted solute-binding protein                      |
| 4912912        | -        | GCTTACTCGTATAGACGA        | 80.00        | -N(111)- pra2 SAV3988 - - putative replication activator protein Pra                |
| 5569500        | +        | GGCCCATGGTCCGGACCA        | 82.66        | -N(337)- sig40 SAV4561 - - putative RNA polymerase ECF-subfamily sigma factor       |
| 5615809        | -        | ACCCACAGGTCTAAACCA        | 82.00        | -N(104)- acsA1 SAV4599 - - putative acetyl-CoA synthetase                           |
| 6275198        | -        | <i>ACTGAGTGGTGTAGACCA</i> | 94.00        | -N(105)- - SAV5167 - - putative PTS transmembrane component                         |
| 6275215        | -        | <i>TACAACAGGTCTACACCA</i> | 81.00        | -N(122)- - SAV5167 - - putative PTS transmembrane component                         |
| 6276676        | +        | GACAGGTGGTGTAGACCA        | 90.69        | -N(105)- - SAV5169 - - hypothetical protein                                         |

|                |          |                            |              |                 |                                                              |
|----------------|----------|----------------------------|--------------|-----------------|--------------------------------------------------------------|
| 6276682        | -        | GGCAACTGGTCTACACCA         | 89.00        | -N(53)-         | - SAV5168 - - putative PTS transmembrane component           |
| 6308489        | -        | ACTCATTGGTCCAGAGCA         | 89.00        | -N(370)-        | - SAV5202 - - putative ATP-dependent helicase                |
| <b>6332002</b> | <b>+</b> | <b>GAGACTTGGTCTAGACCT</b>  | <b>84.96</b> | <b>-N(40)-</b>  | <b>chb SAV5223 - - putative chitin binding protein</b>       |
| 6381466        | +        | GGAGAGTGGTCTATACCC         | 80.26        | -N(58)-         | hexA SAV5268 - - putative beta-N-acetylhexosaminidase        |
| <b>6816504</b> | -        | <b>GACGAAAGGTCTGGACCA</b>  | <b>80.00</b> | <b>-N(69)-</b>  | <b>SAV5636 - - putative endochitinase</b>                    |
| 6816519        | +        | GTCAATAGGTCTGGACCA         | 84.25        | -N(135)-        | SAV5637 - - putative aldo/keto reductase                     |
| <b>6816525</b> | -        | <b>CCCCCTCTGGTCCAGACCT</b> | <b>81.00</b> | <b>-N(90)-</b>  | <b>SAV5636 - - putative endochitinase</b>                    |
| 7722587        | +        | CCCCCTTGGTGGAGATCA         | 80.58        | -N(67)-         | SAV6446 - - hypothetical protein                             |
| 8231292        | +        | GAAAGTTCGTCCGGACCA         | 80.09        | -N(62)-         | SAV6898 - - hypothetical protein                             |
| 8236055        | +        | GCTAAGAGGACTAGACCA         | 80.18        | -N(413)-        | ribC SAV6902 - - putative riboflavin synthase                |
| 8236078        | +        | GTCAATAGGTATGGACCA         | 82.44        | -N(390)-        | ribC SAV6902 - - putative riboflavin synthase                |
| 8249843        | +        | TGCCAGTGGTCGGGACCA         | 85.99        | -N(101)-        | SAV6915 - - hypothetical protein                             |
| 8253827        | +        | GGTCAATGGTTCGGACCA         | 84.28        | -N(227)-        | fadE2 SAV6919 - - putative acyl-CoA dehydrogenase            |
| <b>8253833</b> | -        | <b>CGAAATGGTCCGAACCA</b>   | <b>84.00</b> | <b>-N(117)-</b> | <b>chiD SAV6918 - - putative chitinase</b>                   |
| 8431857        | +        | GAGGATTGGTCTTGACCA         | 90.66        | -N(83)-         | SAV7069 - - putative GntR-family transcriptional regulator   |
| 8531318        | +        | GGCAATTAGTCCACACCA         | 80.73        | -N(169)-        | SAV7166 - - putative amidase                                 |
| 8531324        | -        | CGTCACTGGTGTGGACTA         | 80.00        | -N(627)-        | SAV7165 - - putative non-ribosomal peptide synthetase        |
| 8666568        | +        | GACTGCTCGTCCAGACCA         | 80.76        | -N(71)-         | SAV7268 - - hypothetical protein                             |
| 8741829        | +        | CCGCATTGGTCCATACCA         | 89.60        | -N(69)-         | SAV7329 - - putative sugar transporter sugar binding protein |
| 8741835        | -        | GGATTTTGGTATGGACCA         | 87.00        | -N(89)-         | SAV7328 - - hypothetical protein                             |
| 8874611        | -        | AACTACTGGTCCGGACCA         | 86.00        | -N(125)-        | SAV7442 - - putative secreted hydrolase                      |

**Table 10. Sites in the *Streptomyces avermitilis* genome that match the sequence motif represented by matrix 2083.** The non-coding regions of the *S. coelicolor* genome were searched against this matrix to find matches to the corresponding sequence motif. The scanning method assigned a score (maximum 100) to each match site. The minimum score threshold was chosen as 80. The position of the match site is given as the chromosomal sequence coordinate. Descriptions of potential target genes immediately downstream of the motifs were taken from the *S. avermitilis* genome annotation. The distance in nucleotides between the 3' end of the motif and the predicted translational start codon is given in parentheses. Genes encoding proteins that may be involved in degradation of polysaccharide are shown in bold and other genes implicated in carbohydrate transport and catabolism are italicised.
